# Supplementary material for: Analysis of circulating cell-free DNA identifies KRAS copy number gain and mutation as a novel prognostic marker in Pancreatic cancer
Source: PubMed Central journal article supplement (PMC6690979; doi:10.1038/s41598-019-47489-7), 2019-08-12
Supplement: 41598_2019_47489_MOESM1_ESM.pdf [file 41598_2019_47489_MOESM1_ESM.pdf]

# **Analysis of circulating cell-free DNA identifies *KRAS* copy number gain and mutation as a novel prognostic marker in Pancreatic cancer**

Sumitra Mohan<sup>1</sup>, Mahmood Ayub<sup>1</sup>, Dominic G. Rothwell<sup>1</sup>, Sakshi Gulati<sup>1</sup>, Bedirhan Kilerci<sup>1</sup>, Antoine Hollebecque<sup>1</sup>, Hui Sun Leong<sup>2</sup>, Nigel K. Smith<sup>1</sup>, Sudhakar Sahoo<sup>2</sup>, Tine Descamps<sup>1</sup>, Cong Zhou<sup>1</sup>, Richard A. Hubner<sup>3</sup>, Mairéad G. McNamara<sup>3,4</sup>, Angela Lamarca<sup>3</sup>, Juan W. Valle<sup>3,4#</sup>, Caroline Dive<sup>1#</sup> and Ged Brady<sup>1#</sup>.

<sup>1</sup>Clinical Experimental Pharmacology Group, CRUK Manchester Institute University of Manchester, M20 4BX, UK, <sup>2</sup>Computational Biology Support, CRUK Manchester Institute, University of Manchester, M20 4BX, <sup>3</sup>Medical Oncology Department, The Christie NHS Foundation Trust; Division of Cancer Sciences, University of Manchester, M20 4BX, Manchester, United Kingdom, <sup>4</sup>Division of Cancer Sciences, University of Manchester, M20 4BX, Manchester, UK

# Joint senior authors, correspondence to gerard.brady-2@manchester.ac.uk

## **Supplementary Information**

**Supplementary Figure 1:** Kaplan-Meier analysis of overall survival according to *KRAS* mutations detected by A) ddPCR assay and B) NGS assay

**Supplementary Table1:** Summary of patient characteristics

**A**

***KRAS* mutation detection by ddPCR assay**

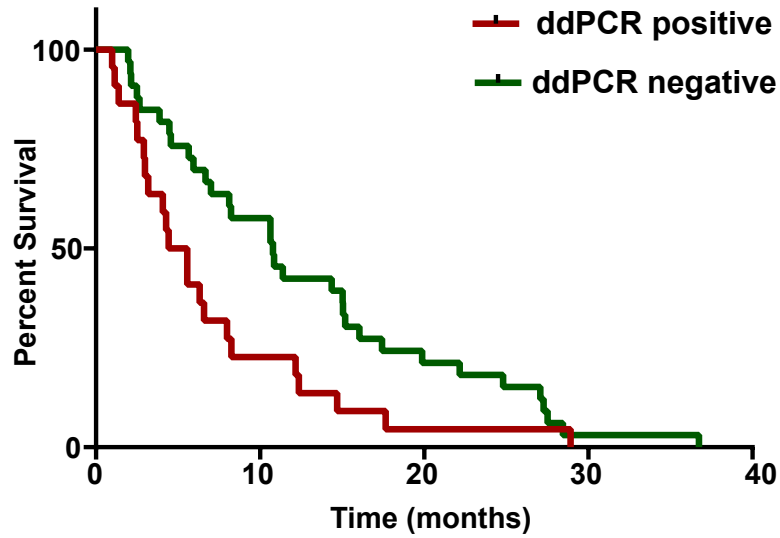

Median OS: 5 months vs 10.7 months  
p-value: 0.0222

**B**

***KRAS* mutation detection by NGS assay**

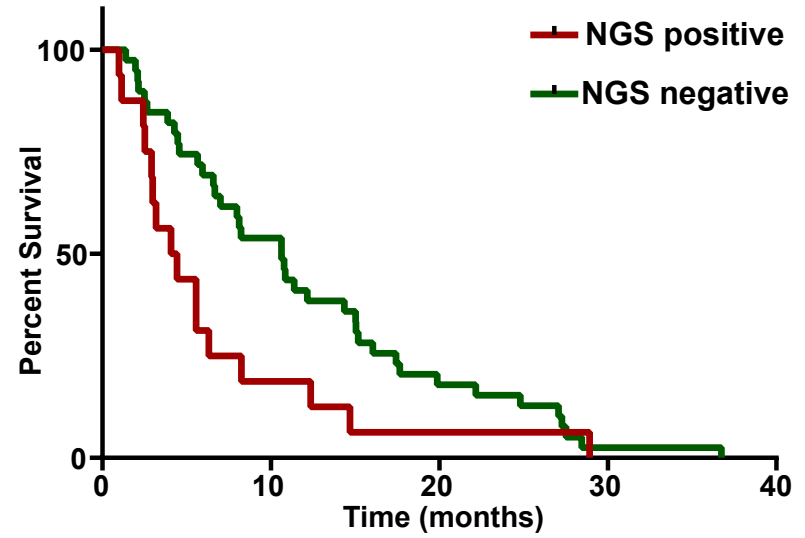

Median OS: 4.25 months vs 10.625 months  
p-value: 0.0363
